# Supplementary material for: Novel Spirocyclic Dimer, SpiD3, Targets Chronic Lymphocytic Leukemia Survival Pathways with Potent Preclinical Effects
Source: PubMed Central journal article supplement (PMC11110724; doi:10.1158/2767-9764.crc-24-0071), 2024-05-22
Supplement: crc-24-0071-s01.pdf [file crc-24-0071-s01.pdf]

## SUPPLEMENTARY METHODS

### Click chemistry

OSU-CLL cells ( $2 \times 10^6$  cells/mL) were treated with the alkyne-tagged derivative of analog 19 (10  $\mu$ M) for 2 h at 37°C. Lysates were prepared in lysis buffer [150 mM NaCl, 50 mM HEPES pH 7.4, 1 % Igepal CA-630 and 1% sodium dodecyl sulfate (SDS)] that contained fresh protease and phosphatase inhibitors (1:100; Sigma-Aldrich; St. Louis, MO), and centrifuged at 13,000 rpm for 10 min at 4°C. Protein concentrations of supernatants were determined by the BCA assay (ThermoFisher Scientific; Waltham, MA) and 100  $\mu$ g of protein was reacted with 10  $\mu$ L of BTAA ligand (40 mM), 10  $\mu$ L of Copper (II) Sulfate + Protectant, 10  $\mu$ L of reducing agent (20 mg) and 10  $\mu$ L of 5 mM TAMRA biotin azide (Click Chemistry Tools; Scottsdale, AZ). The mixture was rotated for 90 min at room temperature and then the proteins were precipitated by adding equal volumes of 3:1 chloroform/methanol and the pellets were washed with ice-cold methanol. The pellets were then resuspended in resuspension buffer (150 mM NaCl, 50 mM Tris, and 1% SDS) and incubated with streptavidin agarose resin (Click Chemistry Tools) for 2 h on a rotator. The resin was centrifuged and washed with resuspension buffer, then 1 % SDS in phosphate-buffered saline (PBS), and then with only PBS.

For the mass spectrometry analysis, the resin was resuspended in 500  $\mu$ L of DTT (10 mM) and heated at 70°C for 15 min. Following a 5 min centrifugation, 1 mL of iodoacetamide solution (40 mM) was added and incubated in the dark for 30 min. The resin was pelleted and washed with PBS and then added to 300  $\mu$ L of digestion buffer (2 mM of  $\text{CaCl}_2$ , 100 mM Tris, and 0.5 M Urea) and 3  $\mu$ g of trypsin and incubated overnight on a rotator. The next day, the resin was washed with PBS, and supernatant was collected and concentrated using a SpeedVac. The peptides were cleaned from salts and detergents and analyzed using a high-resolution mass spectrometry nano-LC-MS/MS Tribrid system, Orbitrap Fusion™ Lumos™ coupled with UltiMate 3000 HPLC system (ThermoFisher Scientific) at the UNMC Proteomics Core. Approximately 1  $\mu$ g of peptides were run on the pre-column (Acclaim PepMap™ 100, 75  $\mu$ m  $\times$  2 cm, nanoViper; ThermoFisher Scientific) and the analytical column (Acclaim PepMap™ RSCL, 75  $\mu$ m  $\times$  50 cm, nanoViper; ThermoFisher Scientific). The samples were eluted using a 155-min linear gradient of ACN (4-45%) in 0.1% FA. All MS/MS samples were analyzed using Proteome Discoverer (ThermoFisher Scientific, v2.2.). Sequest HT was set up to search the SwissProt database (selected for Human, 2021\_04, 20395 entries) assuming the digestion enzyme trypsin. The parameters for Sequest HT were set as follows: Enzyme: trypsin, Max missed cleavage: 2, Precursor mass tolerance: 10 ppm, Peptide tolerance:  $\pm$  0.6 Da, Fixed modifications: carbamidomethyl (C); Dynamic modifications: oxidation (M). Consensus workflow was chosen for

35 enhanced annotation LFQ and precursor quantitation. The parameters for Precursor ion quantifier  
36 were set as follows: peptides to use: unique + razor; precursor abundance: intensity;  
37 normalization mode: total peptide amount; scaling mode: on all average; peptide confidence: high;  
38 target *FDR* (strict): 0.01; target *FDR* (relaxed): 0.05. The data was analyzed by comparing the list  
39 of proteins from each experiment in a Venn diagram and the list of proteins that were found in at  
40 least two out of the three biological replicates/samples were put into EnrichR  
41 (RRID:SCR\_001575) [1-3] for pathway analysis. The pathways were graphed in a bubble plot  
42 based on their  $-\text{Log}_{10} P$  values. Mass spectrometry data is available via ProteomeXchange with  
43 identifier PXD043717.

44 For the immunoblotting, the resin was resuspended in 500  $\mu\text{L}$  of regeneration buffer (0.1  
45 M HCL glycine, pH 2.8) and incubated for 10 min at room temperature. The resin was centrifuged,  
46 and the eluents were collected and concentrated using an Amicon 10 kDa molecular weight cutoff  
47 filter (Sigma-Aldrich). The concentrated samples were evaporated to dryness in a SpeedVac for  
48 10 h at 4°C. The lyophilized samples were dissolved in PBS (25  $\mu\text{L}$ ) and 6X sample loading dye  
49 was added (5  $\mu\text{L}$ ) and vortexed. The input lysate was dissolved in 15  $\mu\text{L}$  of PBS and 2X loading  
50 dye was added (15  $\mu\text{L}$ , Bio-Rad; Hercules, CA) and vortexed. All samples were heated to 90°C  
51 for 5 min, subjected to SDS-PAGE, and subsequent immunoblotting.

52

### 53 **Mass spectrometry**

54 OSU-CLL ( $2 \times 10^6$  cells/mL) were treated for 24 h with 1  $\mu\text{M}$  SpiD3 or vehicle equivalent  
55 (DMSO;  $n = 3$  replicates), and whole cell lysates were extracted and quantified according to the  
56 immunoblotting protocol. Using the tandem mass tag (TMT) 10-plex Mass Tag Labeling Kits  
57 (ThermoFisher Scientific), 100  $\mu\text{g}$  of each sample was diluted with 100 mM TEAB and labeled.  
58 Pierce Quantitative Colorimetric Peptide Assay (ThermoFisher Scientific) was used for peptide  
59 quantification and the labeled peptides were run on the Orbitrap Fusion™ Lumos™  
60 (ThermoFisher Scientific) mass spectrometry machine at the UNMC Proteomics Core and then  
61 analyzed using Proteome Discoverer (ThermoFisher Scientific, v2.2). Sequest HT was set up to  
62 search the SwissProt database (selected for Human, 2021\_04, 20395 entries) assuming the  
63 digestion enzyme trypsin. The parameters for Sequest HT were set as follows: Enzyme: trypsin;  
64 Max missed cleavage: 2; Precursor mass tolerance: 10 ppm; Peptide tolerance:  $\pm 0.6$  Da; Fixed  
65 modifications: carbamidomethyl (C); Dynamic modifications: oxidation (M). Consensus workflow  
66 was chosen for enhanced annotation LFQ and precursor quantitation. The parameters for  
67 Precursor ion quantifier were set as follows: peptides to use: unique + razor; precursor  
68 abundance: intensity; normalization mode: total peptide amount; scaling mode: on all average;

69 peptide confidence: high; target *FDR* (strict): 0.01; target *FDR* (relaxed): 0.05. Differential protein  
70 expression analysis was performed using the limma package (RRID:SCR\_010943) [4]. Functional  
71 annotation and pathway enrichment analysis for the differentially expressed proteins ( $P > 0.05$ )  
72 were evaluated using MSigDB (RRID:SCR\_016863) [5-7]. Mass spectrometry data is available  
73 via ProteomeXchange with identifier PXD043688.

74

### 75 **Weighted gene co-expression network analysis (WGCNA)**

76 Using the top 75% most variably expressed genes ( $n = 15,005$ ), a pairwise gene  
77 correlation matrix was calculated with a Pearson correlation analysis, which was transformed into  
78 a signed weighted matrix to produce an adjacency matrix after raising values by an exponent beta  
79 ( $\beta = 10$ ). Then the adjacency was transformed into a topological overlap matrix (TOM). The  
80 dynamic tree cut method was used for module identification from the hierarchical clustering of  
81 genes using 1-TOM as the distance measure with a deepSplit value of 2 and a minimum size  
82 cutoff of 15 genes. Finally, modules and their relationship to drug concentration (1  $\mu\text{M}$  or 2  $\mu\text{M}$   
83 SpiD3) or vehicle (DMSO) were identified using Pearson correlation analysis between the  
84 modules and external traits. Functional annotation of identified modules was performed using  
85 tools provided by the WGCNA package (RRID:SCR\_003302) [8].

86

### 87 **Chemotaxis assay**

88 Following 1 h pretreatment with DMSO, SpiD3, or ibrutinib, OSU-CLL (25,000 cell/mL)  
89 cells were placed on 5  $\mu\text{M}$  trans-well inserts in 24-well plates containing 200 ng/mL CXCL-12  
90 (PeproTech; Cranbury, NJ). After 6 h, the number of cells that migrated through the insert towards  
91 the chemokines were counted by flow cytometry analysis. The chemotaxis index represents the  
92 number of cells that migrated toward the indicated chemokine divided by the number of cells that  
93 migrated with no chemokine present for each treatment condition.

### 94 **Real time quantitative PCR**

95 RNA was extracted from CLL cells after inhibitor treatment using the miRNeasy Mini Kit  
96 (Qiagen; Hilden, Germany). RNA (1 mg) was used to make cDNA using iScript cDNA Synthesis  
97 Kit (Bio-Rad) following the manufacture's protocol. mRNAs were quantified with iTaq Universal  
98 SYBR Green Supermix (Bio-Rad) on the QuantStudio®3 Real-Time PCR System (Applied  
99 Biosystems, Waltham, MA). Target gene expression was determined using the  $2^{-\Delta\Delta\text{CT}}$  method [9]  
100 and presented relative to *GAPDH*. Primers were as follows: *IRE1* forward:  
101 5'AGACTTTGTCATCGGCCTTTGCAG3', reverse: 5'-ATTCAGTGTCCACAGTCACCACCA-3';  
102 *EIF2AK3* (*PERK*) forward: 5'-GCAACAACGTTTATTGTGCGCAGG-3', reverse: 5'-

103 AAACAACCTCCAAAGCCACCACGTC-3'; *ATF4* forward: 5'-AAGCCTAGGTCTCTTAGATG-3',  
104 reverse: 5'-TTCCAGGTCATCTATACCCA-3'; *DDIT3* (*CHOP*) forward: 5'-  
105 TCTTCACCACTCTTGACCCTGCTT-3', reverse: 5'-GTTCTTTCTCCTTCATGCGCTGCT-3'; and  
106 *GAPDH* forward: 5'-TGAAGGTCGGAGTCAACGGA-3', reverse: 5'-  
107 CCATTGATGACAAGCTTCCCG-3'.

108

### 109 **Immunoblot assays**

110 The NE-PER™ extraction kit (ThermoFisher Scientific) was used for nuclear and  
111 cytoplasmic lysate preparation following manufacturer instructions. For the cap-binding assay,  
112 whole cell lysate (WCL) was incubated with agarose-immobilized m<sup>7</sup>GTP cap analogs (Jena  
113 Bioscience; Germany) to capture eIF4E and its binding partners (4E-BP1, eIF4G) as previously  
114 described [10]. The WCL was prepared using protein lysis buffer (20 mM Tris pH 7.4, 150 mM  
115 NaCl, 1% Igepal CA-630, 5 mM EDTA) containing protease and phosphatase inhibitor cocktails  
116 and phenylmethyl sulfonyl fluoride (Sigma-Aldrich).

117 BCA protein analysis (ThermoFisher Scientific) was used to determine equal  
118 concentrations of protein for each sample lysate (whole cell, nuclear, or cytoplasmic). All samples  
119 were heated to 90°C for 5 min, subjected to SDS-PAGE, and subsequent immunoblotting.

120

### 121 **SpiD3 prodrug (SpiD3\_AP) synthesis details**

122 **General methods - Chemistry:** All reagents were purchased from commercial sources and used  
123 without further purification. Flash chromatography was carried out on silica gel (200–400 mesh).  
124 Thin-layer chromatography was run on pre-coated ANALTECH plates and observed under UV  
125 light at 254 nm. Column chromatography was performed with silica gel (230-400 mesh, grade 60,  
126 Fisher Scientific; Hampton, NH). <sup>1</sup>H NMR (400 MHz) and <sup>13</sup>C NMR (100 MHz) spectra were  
127 recorded in chloroform-d or DMSO-*d*<sub>6</sub> on a Bruker-400 spectrometer (DMSO-*d*<sub>6</sub> was 2.50 ppm  
128 for <sup>1</sup>H and 39.55 ppm for <sup>13</sup>C, and CDCl<sub>3</sub> was 7.26 ppm for <sup>1</sup>H and 77.23 ppm for <sup>13</sup>C). Proton and  
129 carbon chemical shifts were reported in ppm relative to the signal from residual solvent proton  
130 and carbon. The data are presented as follows: chemical shift, multiplicity (s = singlet, d = doublet,  
131 t = triplet, q = quartet, p = pentet, m = multiplet and/or multiple resonances), coupling constant in  
132 hertz (Hz), and integration. The purified compounds were further confirmed by high-resolution  
133 mass spectrometry (HRMS) analysis using the Agilent 6230 time-of-flight LC/MS (LC/TOF)  
134 system (Santa Clara, CA).

135 **1',1'''-(propane-1,3-diyl)bis(4-((dimethylamino)methyl)-3,4-dihydro-5H-spiro[furan-2,3'-**  
136 **indoline]-2',5-dione) (SpiD3\_AP):** Dichloromethane (4 mL), MeOH (10 mL) was added to a  
137 stirred solution of SpiD3 (250 mg, 0.53 mmol). The mixture was stirred at 0°C for 10 min, followed  
138 by the addition of a 2M solution of dimethylamine (0.611 mL, 1.22 mmol). The reaction was  
139 allowed to stir for 5 min at 0°C. The solvent and excess dimethylamine were removed under  
140 vacuum. The crude product was further dissolved in 1 mL of tetrahydrofuran, to which *n*-pentane  
141 was slowly added until white precipitates formed. The resulting solid was filtered, washed with *n*-  
142 pentane, and dried; Yield = 84.5% (251 mg); <sup>1</sup>H NMR (400 MHz, CDCl<sub>3</sub>) δ (mixture of  
143 diastereomers) 7.37 (dt, *J* = 13.5, 7.2 Hz, 4H), 7.14 (dd, *J* = 15.0, 7.4 Hz, 2H), 6.93 – 6.72 (m,  
144 2H), 4.00 – 3.66 (m, 4H), 3.64 – 3.50 (m, 1H), 3.30 – 3.14 (m, 1H), 2.88 (m, *J* = 7.7, 4.5 Hz, 2H),  
145 2.81 – 2.52 (m, 4H), 2.49 – 2.35 (m, 2H), 2.31 (dd, *J* = 4.0, 2.0 Hz, 12H), 2.14 (m, 2H); <sup>13</sup>C NMR  
146 (100 MHz, CDCl<sub>3</sub>) δ 177.3, 177.2, 176.9, 174.6, 174.5, 173.9, 142.9, 142.8, 142.3, 131.3, 131.2,  
147 127.8, 126.2, 124.7, 124.0, 123.7, 109.0, 108.9, 81.1, 80.8, 80.7, 60.7, 59.9, 45.6, 45.4, 39.1,  
148 38.6, 38.0., 37.9, 37.8, 37.6, 37.5, 36.9, 35.6, 25.1, 25.0, 24.8; HRMS(ESI +): *m/z* calculated for  
149 C<sub>31</sub>H<sub>36</sub>N<sub>4</sub>O<sub>6</sub>, 561.2708, found, 561.1647 [M + H]<sup>+</sup>.

150

151 **<sup>1</sup>H NMR (400 MHz, CDCl<sub>3</sub>)**

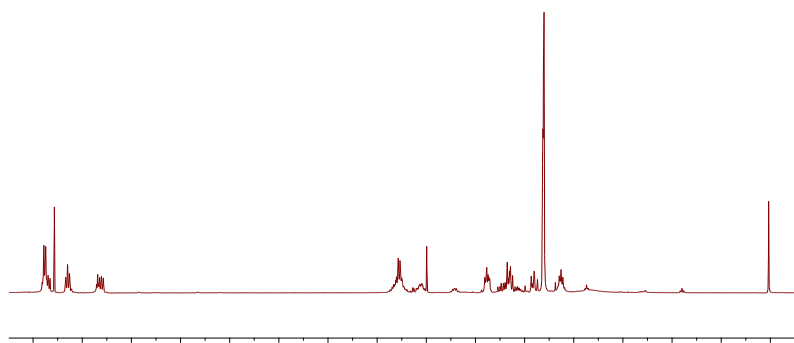

152

153

154  $^{13}\text{C}$  NMR (100 MHz,  $\text{CDCl}_3$ )

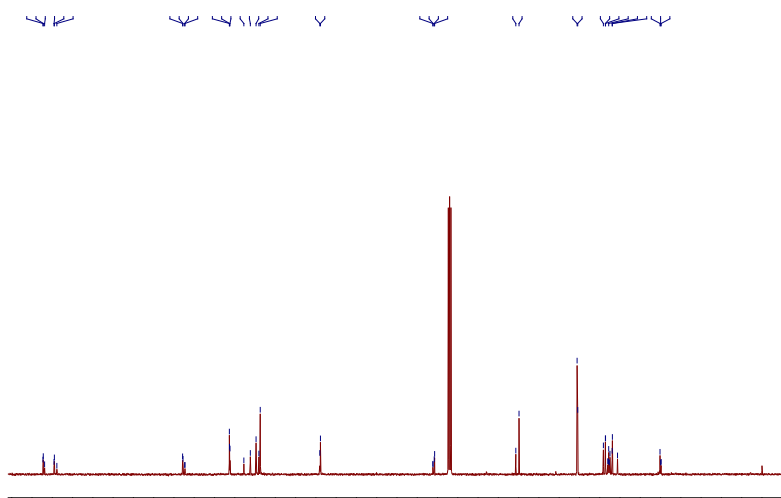

155

156

157 HRMS

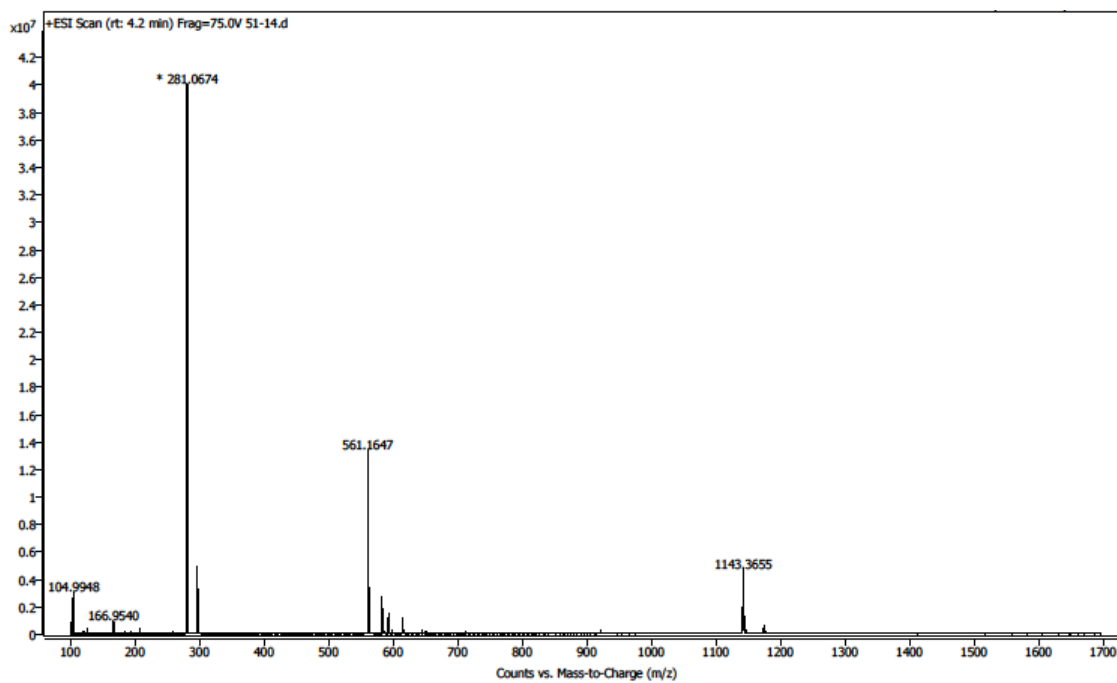

158

159

160 **Metabolic stability studies**

161 The in vitro metabolic stability of SpiD3 and SpiD3\_AP was determined using mouse liver  
162 S9 fraction (XenoTech; Kansas City, KS) adapting previously reported methods [11, 12].  
163 Diclofenac was used as a positive control for in vitro metabolic stability study. Sample analysis  
164 was performed by liquid chromatography-tandem mass spectrometry (SCIEX QTRAP 4000 LC-  
165 MS/MS System).

166

167 **Pharmacokinetics (PK) studies**

168 Intravenous (I.V.) dose pharmacokinetic (PK) studies were performed in CD1 mice. The  
169 intravenous dose of SpiD3\_AP was 10 mg/kg body weight. Sample analysis was performed by  
170 liquid chromatography-tandem mass spectrometry (SCIEX QTRAP 4000 LC-MS/MS System)  
171 adapting previously reported methods [11-15]. PK parameters were determined using non-  
172 compartmental analyses module of WinNonlin® v1.5 (RRID:SCR\_024504).

173 **REFERENCES**

- 174 1. Chen EY, Tan CM, Kou Y, Duan Q, Wang Z, Meirelles GV, et al. Enrichr: interactive and  
175 collaborative HTML5 gene list enrichment analysis tool. *BMC Bioinformatics*. 2013;14:128.
- 176 2. Kuleshov MV, Jones MR, Rouillard AD, Fernandez NF, Duan Q, Wang Z, et al. Enrichr: a  
177 comprehensive gene set enrichment analysis web server 2016 update. *Nucleic Acids Res*.  
178 2016;44(W1):W90-7.
- 179 3. Xie Z, Bailey A, Kuleshov MV, Clarke DJB, Evangelista JE, Jenkins SL, et al. Gene Set  
180 Knowledge Discovery with Enrichr. *Curr Protoc*. 2021;1(3):e90.
- 181 4. Ritchie ME, Phipson B, Wu D, Hu Y, Law CW, Shi W, et al. limma powers differential  
182 expression analyses for RNA-sequencing and microarray studies. *Nucleic Acids Res*.  
183 2015;43(7):e47.
- 184 5. Liberzon A, Birger C, Thorvaldsdottir H, Ghandi M, Mesirov JP, Tamayo P. The Molecular  
185 Signatures Database (MSigDB) hallmark gene set collection. *Cell Syst*. 2015;1(6):417-25.
- 186 6. Liberzon A, Subramanian A, Pinchback R, Thorvaldsdottir H, Tamayo P, Mesirov JP.  
187 Molecular signatures database (MSigDB) 3.0. *Bioinformatics*. 2011;27(12):1739-40.
- 188 7. Subramanian A, Tamayo P, Mootha VK, Mukherjee S, Ebert BL, Gillette MA, et al. Gene  
189 set enrichment analysis: a knowledge-based approach for interpreting genome-wide expression  
190 profiles. *Proc Natl Acad Sci U S A*. 2005;102(43):15545-50.
- 191 8. Langfelder P, Horvath S. WGCNA: an R package for weighted correlation network  
192 analysis. *BMC Bioinformatics*. 2008;9:559.
- 193 9. Livak KJ, Schmittgen TD. Analysis of relative gene expression data using real-time  
194 quantitative PCR and the 2(-Delta Delta C(T)) Method. *Methods*. 2001;25(4):402-8.
- 195 10. Hizli AA, Black AR, Pysz MA, Black JD. Protein kinase C alpha signaling inhibits cyclin D1  
196 translation in intestinal epithelial cells. *J Biol Chem*. 2006;281(21):14596-603.
- 197 11. Gautam N, Bathena SP, Chen Q, Natarajan A, Alnouti Y. Pharmacokinetics, protein  
198 binding and metabolism of a quinoxaline urea analog as an NF-kappaB inhibitor in mice and rats  
199 by LC-MS/MS. *Biomed Chromatogr*. 2013;27(7):900-9.
- 200 12. Napoleon JV, Sagar S, Kubica SP, Boghean L, Kour S, King HM, et al. Small-molecule  
201 IKKbeta activation modulator (IKAM) targets MAP3K1 and inhibits pancreatic tumor growth. *Proc*  
202 *Natl Acad Sci U S A*. 2022;119(18):e2115071119.
- 203 13. Radhakrishnan P, Bryant VC, Blowers EC, Rajule RN, Gautam N, Anwar MM, et al.  
204 Targeting the NF-kappaB and mTOR pathways with a quinoxaline urea analog that inhibits  
205 IKKbeta for pancreas cancer therapy. *Clin Cancer Res*. 2013;19(8):2025-35.



- 206 14. Sagar S, Singh S, Mallareddy JR, Sonawane YA, Napoleon JV, Rana S, et al. Structure  
207 activity relationship (SAR) study identifies a quinoxaline urea analog that modulates IKKbeta  
208 phosphorylation for pancreatic cancer therapy. *Eur J Med Chem.* 2021;222:113579.
- 209 15. Umfress A, Singh S, Ryan KJ, Chakraborti A, Plattner F, Sonawane Y, et al. Systemic  
210 Administration of a Brain Permeable Cdk5 Inhibitor Alters Neurobehavior. *Front Pharmacol.*  
211 2022;13:863762.
- 212
