# Supplementary material for: Novel Spirocyclic Dimer, SpiD3, Targets Chronic Lymphocytic Leukemia Survival Pathways with Potent Preclinical Effects
Source: PubMed Central journal article supplement (PMC11110724; doi:10.1158/2767-9764.crc-24-0071), 2024-05-22
Supplement: crc-24-0071-s02.pdf [file crc-24-0071-s02.pdf]

**Figure S1: WGCNA-identified modules in SpiD3-treated OSU-CLL cells**

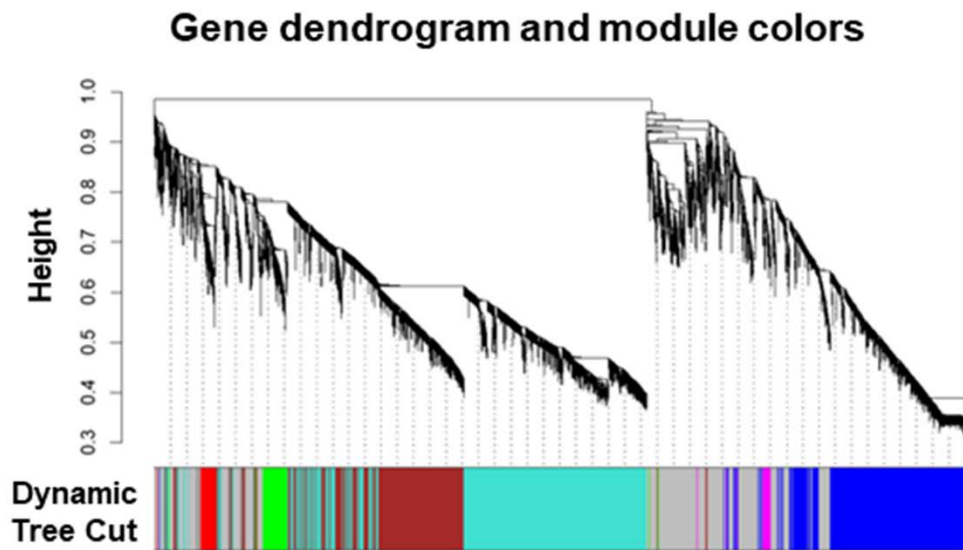

**Figure S1. WGCNA-identified modules in SpiD3-treated OSU-CLL cells.**

OSU-CLL cells treated with vehicle or SpiD3 (1, 2  $\mu$ M) for 4 h were subject to RNA-sequencing analysis and weighted gene co-expression network analysis (WGCNA). Gene dendrogram and colors of WGCNA-identified modules for the top 500 differentially expressed genes ( $P = 0.05$ ) in SpiD3-treated cells are shown.
