# Supplementary material for: Novel Spirocyclic Dimer, SpiD3, Targets Chronic Lymphocytic Leukemia Survival Pathways with Potent Preclinical Effects
Source: PubMed Central journal article supplement (PMC11110724; doi:10.1158/2767-9764.crc-24-0071), 2024-05-22
Supplement: crc-24-0071-s03.pdf [file crc-24-0071-s03.pdf]

Figure S2. RNA-sequencing analysis of SpiD3-treated OSU-CLL cells.

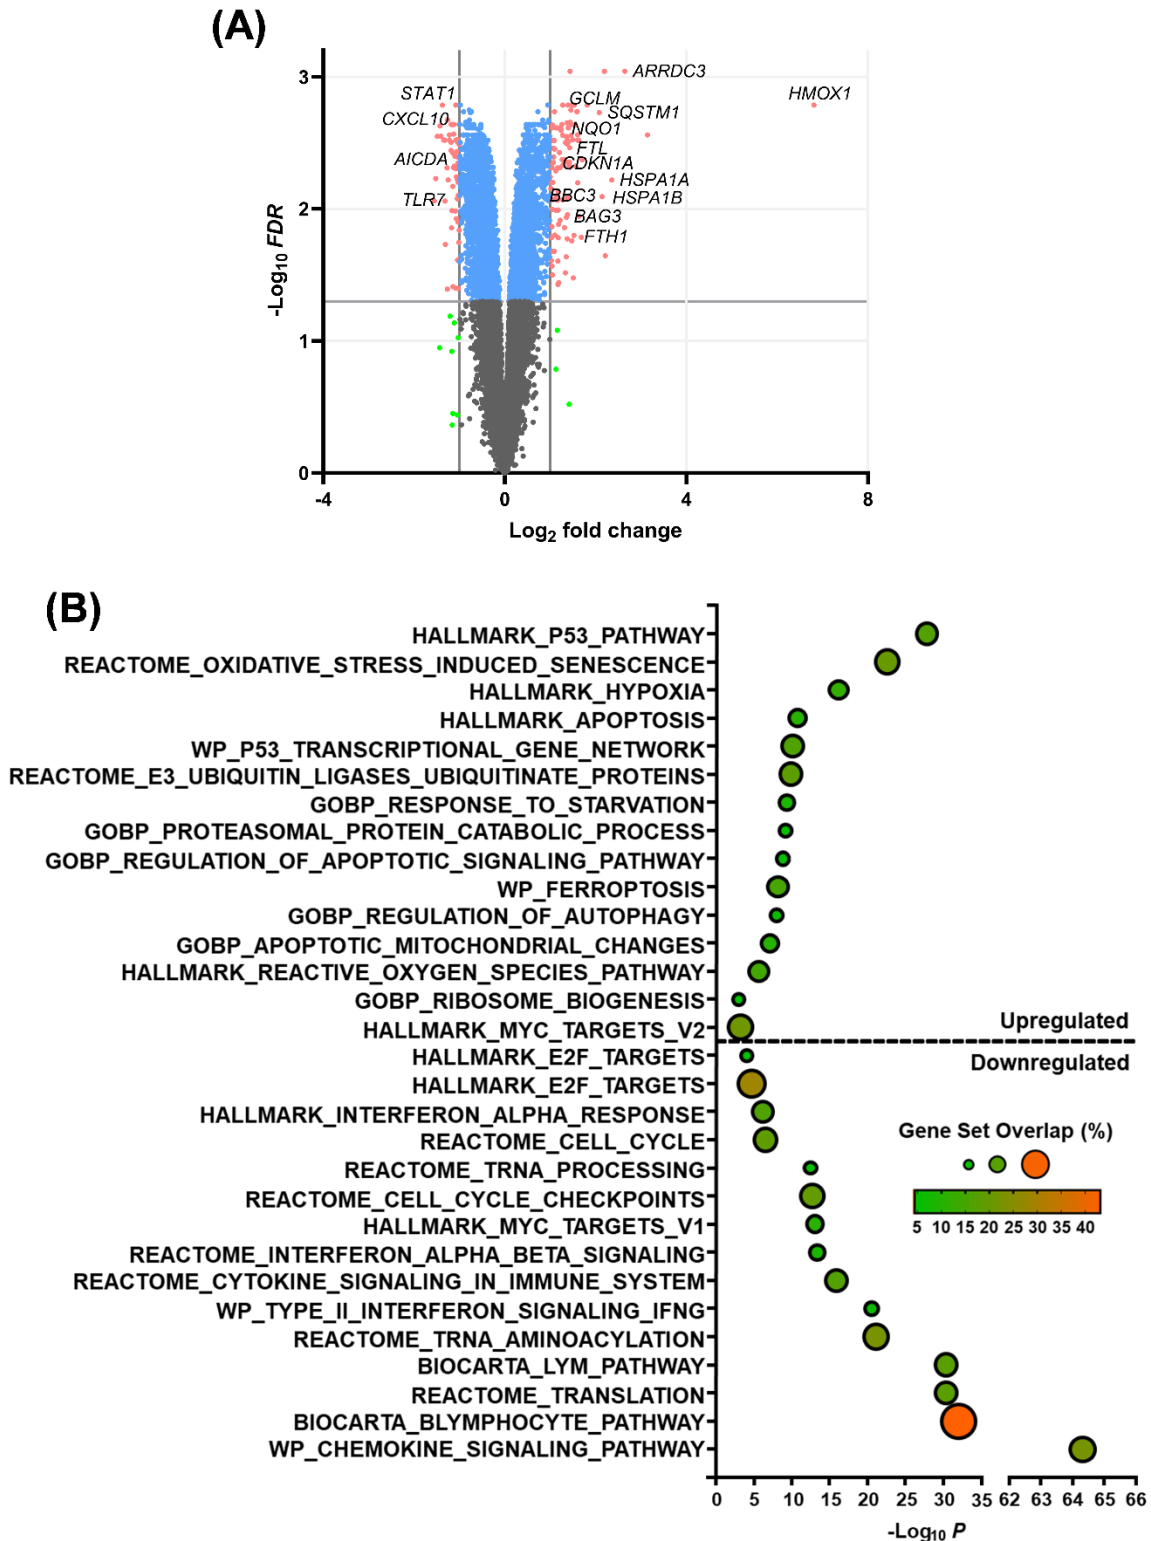

**Figure S2. RNA-sequencing analysis of SpiD3-treated OSU-CLL cells.**

**(A)** Volcano plot of differentially expressed genes (DEGs) in SpiD3-treated OSU-CLL cells (1  $\mu$ M, 4 h) with select disease-relevant genes labeled. Only genes that meet both the statistical significance ( $FDR < 0.05$ ) and fold-change ( $|\text{Log}_2 \text{FC}| > 1$ ) were used for downstream analysis (red). Genes that meet only statistical significance (blue), only fold-change (green), or neither threshold (grey) are shown for comparison. **(B)** Gene set enrichment analysis using the top 500 DEGs ( $P < 0.05$ ) following treatment with 1  $\mu$ M SpiD3 (4 h,  $n = 3$  independent RNA-seq experiments).
