# Supplementary material for: Novel Spirocyclic Dimer, SpiD3, Targets Chronic Lymphocytic Leukemia Survival Pathways with Potent Preclinical Effects
Source: PubMed Central journal article supplement (PMC11110724; doi:10.1158/2767-9764.crc-24-0071), 2024-05-22
Supplement: crc-24-0071-s04.pdf [file crc-24-0071-s04.pdf]

Figure S3. Proteomic analysis of SpiD3-treated CLL cells using TMT-labeling.

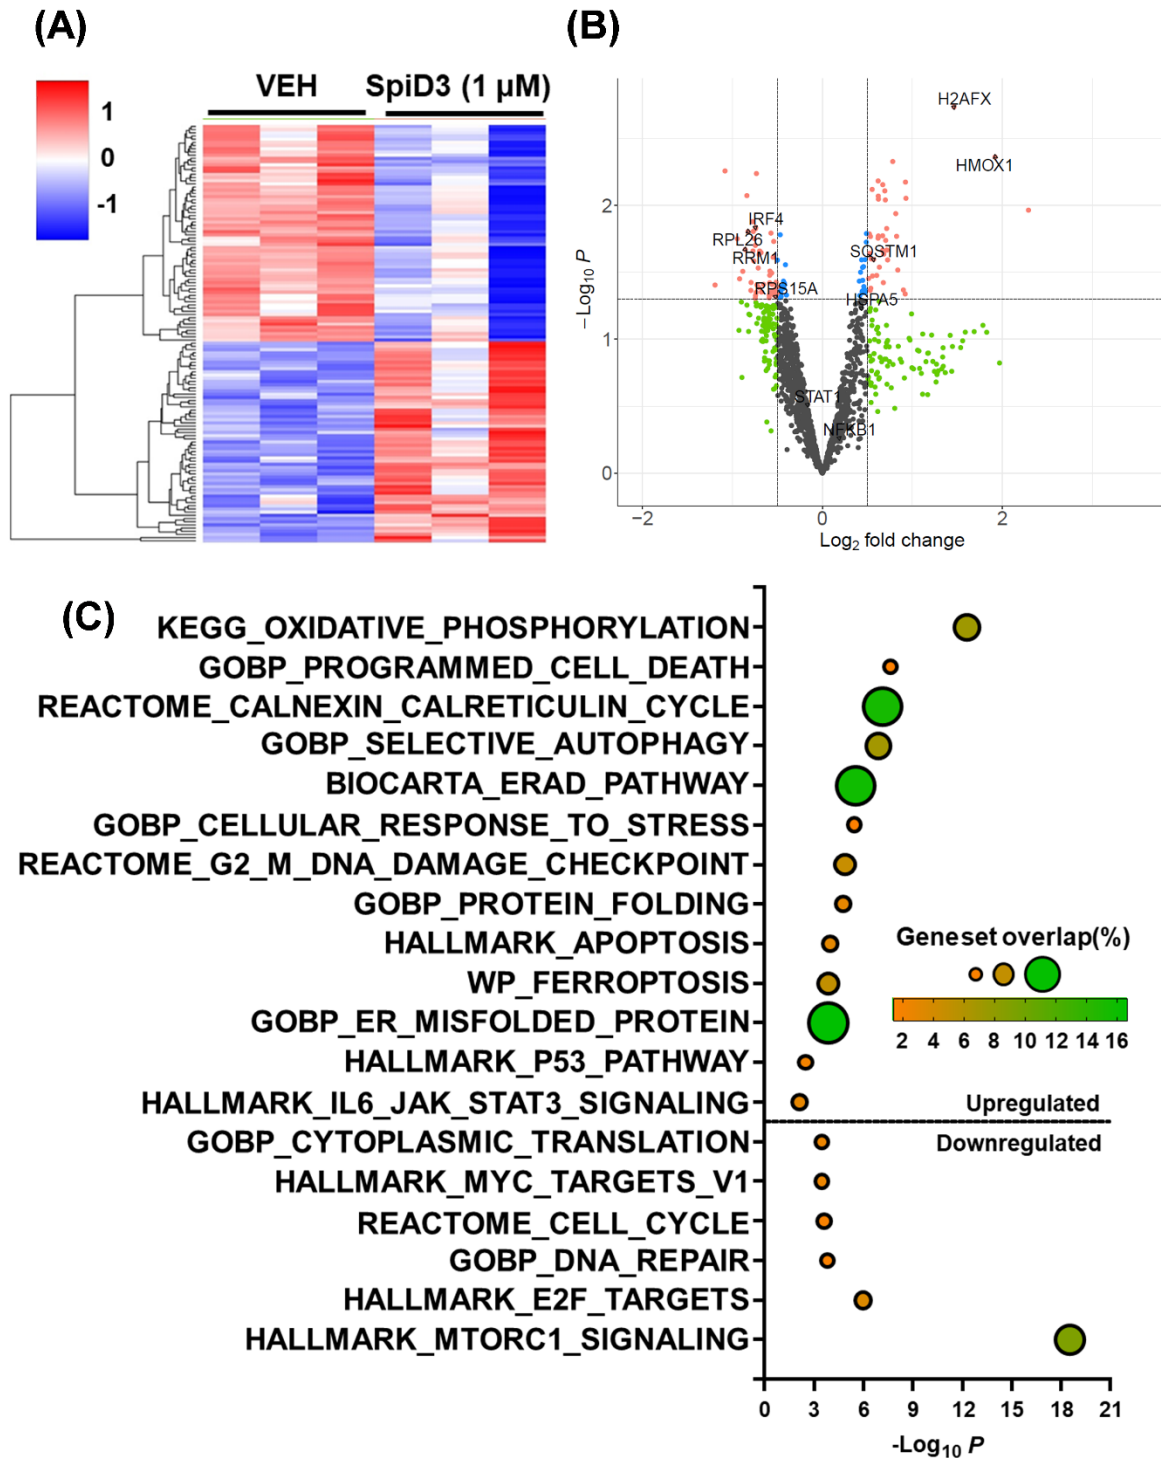

**Figure S3. Proteomic analysis of SpiD3-treated CLL cells using TMT-labeling.**

**(A)** Hierarchical clustering of differentially expressed proteins ( $n = 131$ ,  $P < 0.05$ ) in OSU-CLL cells treated with DMSO vehicle (VEH) or SpiD3 ( $1 \mu\text{M}$ ) for 24 h ( $n = 3$  independent experiments).

**(B)** Volcano plot of differentially expressed proteins in SpiD3-treated OSU-CLL cells with select disease-relevant proteins labeled. Only proteins that meet both the statistical significance ( $P < 0.05$ ) and fold-change ( $|\text{Log}_2 \text{FC}| > 1$ ) were used for downstream analysis (red). Genes that meet only statistical significance (blue), only fold-change (green), or neither threshold (grey) are shown for comparison. **(C)** Gene set enrichment analysis of the differentially expressed proteins following SpiD3 treatment.
