# Supplementary material for: Novel Spirocyclic Dimer, SpiD3, Targets Chronic Lymphocytic Leukemia Survival Pathways with Potent Preclinical Effects
Source: PubMed Central journal article supplement (PMC11110724; doi:10.1158/2767-9764.crc-24-0071), 2024-05-22
Supplement: crc-24-0071-s05.pdf [file crc-24-0071-s05.pdf]

**Figure S4. SpiD3 inhibits CLL chemotaxis and induces transcription of UPR genes.**

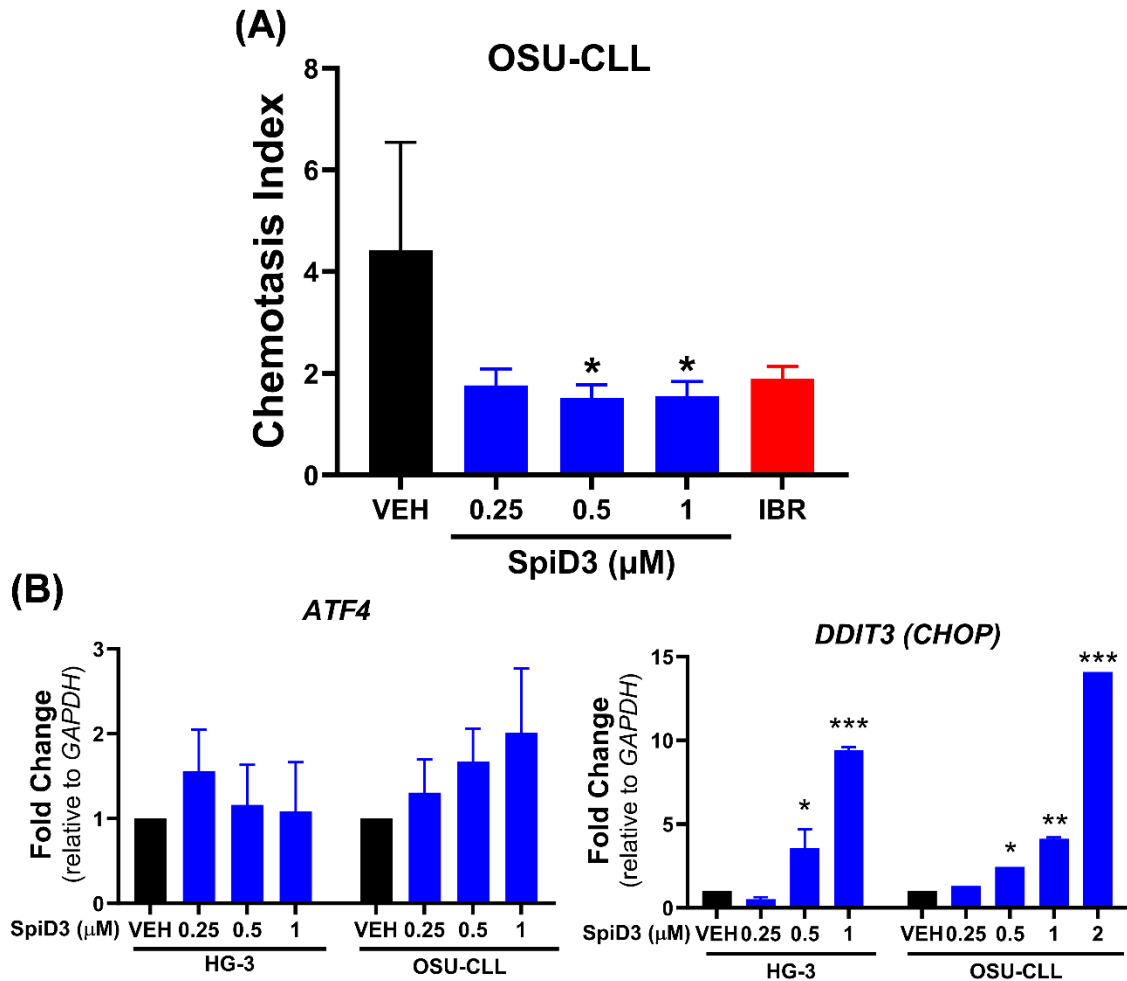

**Figure S4. SpiD3 inhibits CLL chemotaxis and induces transcription of UPR genes.**

**(A)** OSU-CLL cells were pre-treated with SpiD3 (0.25-1  $\mu\text{M}$ ), ibrutinib (IBR, 1  $\mu\text{M}$ ), or equivalent DMSO vehicle (VEH) for 1 h and allowed to migrate for 6 h through trans-well inserts toward 200 ng/mL CXCL-12. The chemotaxis index represents the number of cells that migrated toward the indicated chemokine divided by the number of cells that migrated with no chemokine present for each treatment condition ( $n = 3$  independent experiments). **(B)** Quantitative real-time PCR analysis of *ATF4* and *DDIT3* (*CHOP*) in HG-3 and OSU-CLL cells treated with equivalent VEH or SpiD3 (0.25-2  $\mu\text{M}$ ) for 4 h ( $n = 2-3$  independent experiments/cell line). Transcript expression is normalized to the housekeeping gene (*GAPDH*). Data are shown as fold change to VEH (mean  $\pm$  SEM). Asterisks denote significance vs. VEH: \* $P < 0.05$ , \*\* $P < 0.01$ , \*\*\* $P < 0.001$ .
