# Supplementary material for: Novel Spirocyclic Dimer, SpiD3, Targets Chronic Lymphocytic Leukemia Survival Pathways with Potent Preclinical Effects
Source: PubMed Central journal article supplement (PMC11110724; doi:10.1158/2767-9764.crc-24-0071), 2024-05-22
Supplement: crc-24-0071-s08.pdf [file crc-24-0071-s08.pdf]

**Figure S7. SpiD3 spares healthy stromal and lymphoid cells.**

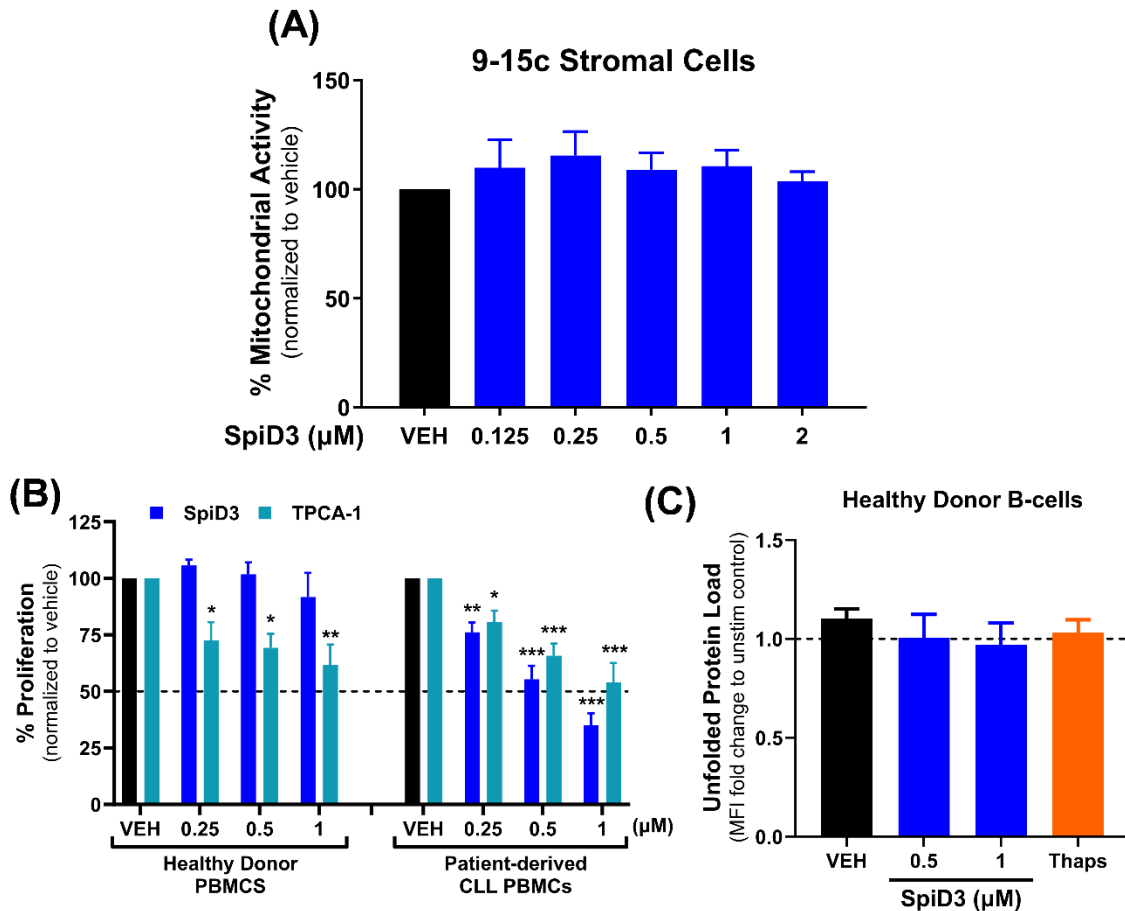

**Figure S7. SpiD3 spares healthy stromal and lymphoid cells.**

**(A)** 9-15c bone marrow-derived stroma cells were treated with SpiD3 (48 h). Mitochondrial activity was assessed via MTS assay and results are given as % mitochondrial activity normalized to vehicle ( $n = 4$  independent experiments). **(B)** Healthy donor PBMCs ( $n = 5$ ) or patient-derived CLL PBMCs ( $n = 8$ ; > 92% CLL B-cells) were treated with the indicated amounts of SpiD3 or TPCA-1 with co-current CpG ODN 2006 stimulation (CpG;  $3.2 \mu\text{M}$ ) for 48 h. Proliferation was assessed via MTS assay and results are given as % proliferation normalized to the CpG-stimulated control. Data are shown as mean  $\pm$  SEM. Asterisks denote significance vs. VEH: \* $P < 0.05$ , \*\* $P < 0.01$ , \*\*\* $P < 0.001$ . **(C)** UPR induction in healthy donor B-cells ( $n = 7$ ) was evaluated following a 24 h ex vivo treatment with SpiD3 or thapsigargin (Thaps;  $1 \mu\text{M}$ ) under co-current CpG stimulation ( $3.2 \mu\text{M}$ ) via incubation with TPE-NMI dye. Data are represented as fold change in TPE-NMI median fluorescence intensity (MFI) compared to the unstimulated control (dashed line).
