# Supplementary material for: Novel Spirocyclic Dimer, SpiD3, Targets Chronic Lymphocytic Leukemia Survival Pathways with Potent Preclinical Effects
Source: PubMed Central journal article supplement (PMC11110724; doi:10.1158/2767-9764.crc-24-0071), 2024-05-22
Supplement: crc-24-0071-s09.pdf [file crc-24-0071-s09.pdf]

**Figure S8. Studies with SpiD3\_AP in CLL.**

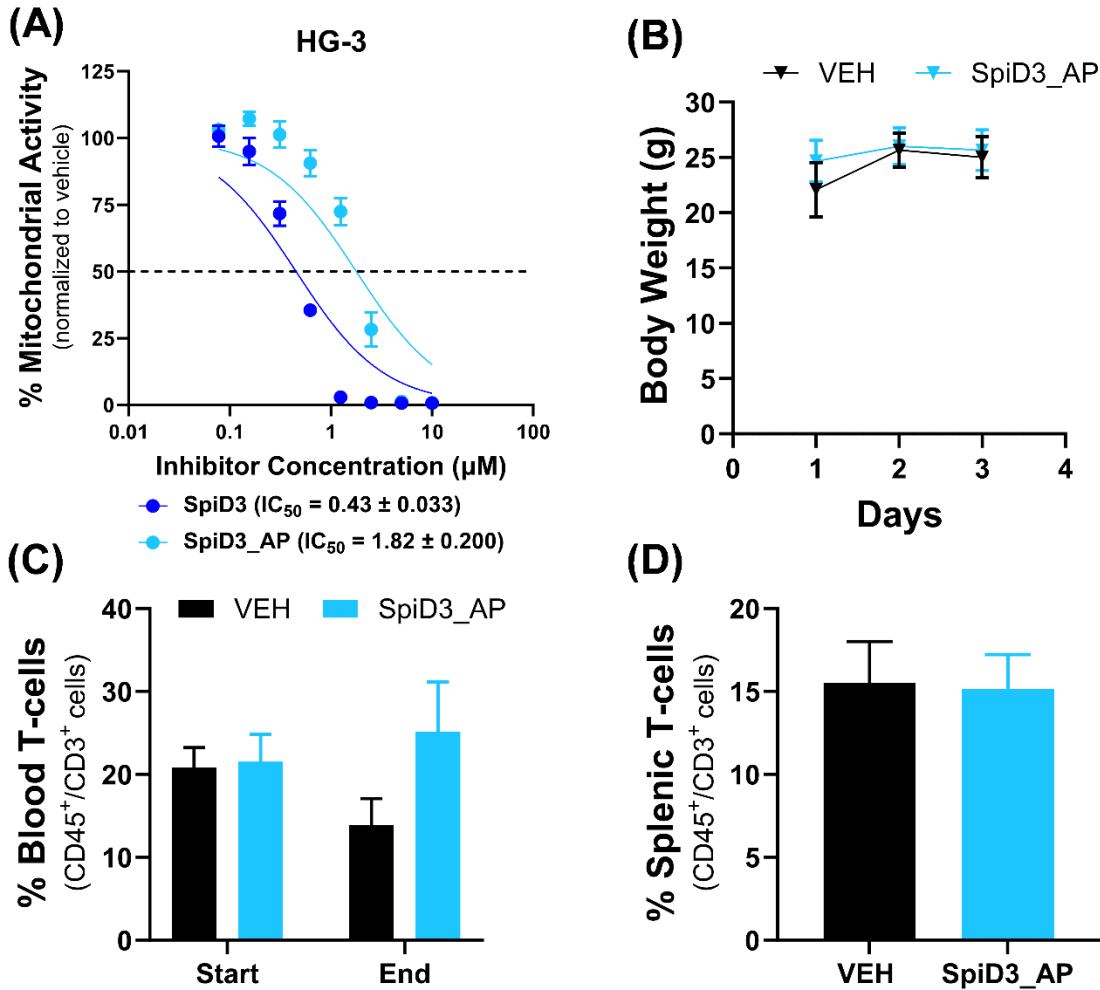

**Figure S8. Studies with SpiD3\_AP in CLL.**

**(A)** Proliferation of HG-3 CLL cell line was determined by MTS assay following treatment with increasing concentrations of SpiD3 or SpiD3 prodrug (SpiD3\_AP) for 72 h ( $n = 3$  independent experiments). Proliferation was assessed via MTS assay and normalized to vehicle.  $\text{IC}_{50}$  values are shown as mean  $\pm$  SEM. **(B-D)**: Diseased E $\mu$ -TCL1 mice (median age = 10.2 mo) were randomized to receive 10 mg/kg SpiD3\_AP or vehicle equivalent (VEH) via intravenously (IV) injection for 3 consecutive days. Equal numbers of male and female mice were used per treatment arm ( $n = 6$  mice/arm). Mouse body weight was monitored throughout the study **(B)**. At study end (~3 h after the last IV injection), mice were sacrificed for tissue harvest. Flow cytometry evaluation of T-cells in blood **(C)** and spleen **(D)**. Data are shown as mean  $\pm$  SEM.
