# Supplementary material for: Novel Spirocyclic Dimer, SpiD3, Targets Chronic Lymphocytic Leukemia Survival Pathways with Potent Preclinical Effects
Source: PubMed Central journal article supplement (PMC11110724; doi:10.1158/2767-9764.crc-24-0071), 2024-05-22
Supplement: crc-24-0071-s10.pdf [file crc-24-0071-s10.pdf]

**Table S1: Characteristics of the patient-derived CLL samples used in the study**

| Patient # | IGHV status | Gender | Age | Treatment | FISH Cytogenetics |                |                |               |            | Karyotype* | Figure(s)                                  |
|-----------|-------------|--------|-----|-----------|-------------------|----------------|----------------|---------------|------------|------------|--------------------------------------------|
|           |             |        |     |           | Deletion (17p)    | Deletion (13q) | Deletion (11q) | Deletion (6q) | Trisomy 12 |            |                                            |
| 1         | Unmut       | M      | 47  | Naïve     | Neg               | Neg            | Neg            | Neg           | Neg        | Normal     | Fig. 4B                                    |
| 2         | Unmut       | M      | 55  | Naïve     | Neg               | Neg            | Pos            | Pos           | Neg        | Complex    | Fig. 4B                                    |
| 3         | Unmut       | F      | 76  | Naïve     | Neg               | Neg            | Pos            | Neg           | Neg        | Normal     | Fig. 4A-B                                  |
| 4         | Unmut       | F      | 65  | Naïve     | Neg               | Neg            | Neg            | Neg           | Pos        | Normal     | Fig. 4B                                    |
| 5         | NA          | M      | 81  | Treated   | Neg               | Neg            | Neg            | Neg           | Neg        | Normal     | Fig. 4B                                    |
| 6         | NA          | F      | 68  | Treated   | Neg               | Neg            | Neg            | Neg           | Pos        | Normal     | Fig. 4A                                    |
| 7         | Mut         | M      | 94  | Treated   | Neg               | Neg            | Neg            | Neg           | Pos        | Normal     | Fig. 4A                                    |
| 8         | Unmut       | M      | 76  | Treated   | Pos               | Neg            | Neg            | Neg           | Neg        | Complex    | Fig. 4A                                    |
| 9         | Mut         | M      | 47  | Naïve     | Neg               | Neg            | Neg            | Neg           | Pos        | Complex    | Fig. 4A                                    |
| 10        | Unmut       | F      | 62  | Naïve     | Neg               | Neg            | Neg            | Neg           | Pos        | Normal     | Fig. 4A                                    |
| 11        | Unmut       | M      | 76  | Treated   | Neg               | Neg            | Neg            | Neg           | Pos        | Normal     | Fig. 4A-B                                  |
| 12        | Unmut       | M      | 45  | Naïve     | Neg               | Neg            | Pos            | Neg           | Pos        | Normal     | Fig. 4A                                    |
| 13        | NA          | M      | 57  | Naïve     | Pos               | Neg            | Neg            | Neg           | Neg        | Complex    | Fig. 4A                                    |
| 14        | Unmut       | M      | 70  | Naïve     | Neg               | Neg            | Neg            | Neg           | Neg        | Normal     | Fig. 4A                                    |
| 15        | Unmut       | M      | 34  | Naïve     | Neg               | Neg            | Neg            | Neg           | Pos        | Normal     | Fig. 4A                                    |
| 16        | Unmut       | F      | 60  | Treated   | Neg               | Neg            | Pos            | Neg           | Neg        | Normal     | Fig. 4A                                    |
| 17        | Unmut       | M      | 47  | Naïve     | Neg               | Neg            | Neg            | Neg           | Neg        | Normal     | Fig. 4A                                    |
| 18        | Unmut       | F      | 52  | Naïve     | Neg               | Neg            | Neg            | Neg           | Neg        | Complex    | Fig. 4A                                    |
| 19        | Mut         | F      | 66  | Treated   | Neg               | Pos            | Neg            | Neg           | Neg        | Normal     | Fig. 4B, Fig. 5C-D, Supp. Fig S7B          |
| 20        | Unmut       | F      | 68  | Treated   | Neg               | Pos            | Pos            | Neg           | Neg        | NA         | Fig. 4B                                    |
| 21        | Mut         | F      | 78  | Treated   | Neg               | Pos            | Pos            | Neg           | Neg        | Complex    | Fig. 4B                                    |
| 22        | Mut         | M      | 80  | Naïve     | Neg               | Pos            | Neg            | Neg           | Neg        | NA         | Fig. 4C, Fig. 5C-D, Supp. Fig S7B          |
| 23        | Unmut       | F      | 53  | Naïve     | Neg               | Pos            | Neg            | Neg           | Neg        | Normal     | Fig. 4B-D                                  |
| 24        | NA          | M      | 66  | Naïve     | NA                | NA             | NA             | NA            | NA         | NA         | Fig. 4D                                    |
| 25        | Mut         | M      | 78  | Naïve     | Neg               | Pos            | Neg            | Neg           | Neg        | Normal     | Fig. 4B                                    |
| 26        | Unmut       | M      | 65  | Naïve     | Neg               | Neg            | Neg            | Neg           | Neg        | NA         | Fig. 4B, Fig. 4D, Fig. 5C-D                |
| 27        | Unmut       | F      | 65  | Naïve     | Neg               | Pos            | Pos            | Neg           | Neg        | NA         | Fig. 4B-D, Supp. Fig S7B                   |
| 28        | Mut         | M      | 45  | Treated   | Neg               | Neg            | Neg            | Neg           | Neg        | NA         | Fig. 4D                                    |
| 29        | NA          | M      | 66  | Naïve     | Neg               | Neg            | Neg            | Neg           | Neg        | Normal     | Fig. 4C, Fig. 4E, Fig. 5C-D, Supp. Fig S7B |
| 30        | NA          | F      | 58  | Naïve     | NA                | NA             | NA             | NA            | NA         | NA         | Fig. 4B-C                                  |
| 31        | Unmut       | M      | 45  | Treated   | Neg               | Pos            | Neg            | Neg           | Neg        | Normal     | Fig. 4B-C                                  |
| 32        | Unmut       | M      | 72  | Naïve     | Neg               | Neg            | Neg            | Neg           | Neg        | Normal     | Fig. 4D                                    |
| 33        | Unmut       | M      | 70  | Naïve     | Pos               | Neg            | Neg            | Neg           | Neg        | NA         | Fig. 4B, Fig. 4E, Supp. Fig S7B            |
| 34        | Unmut       | F      | 68  | Treated   | Neg               | Neg            | Neg            | Neg           | Neg        | Normal     | Fig. 4A, Fig. 4C-D, Supp. Fig S7B          |
| 35        | Unmut       | M      | 68  | Naïve     | Neg               | Neg            | Neg            | Pos           | Neg        | NA         | Fig. 4B, Fig. 5C-D                         |
| 36        | NA          | F      | 75  | Treated   | Pos               | Pos            | Neg            | Neg           | Neg        | Complex    | Fig. 4D, Fig. 5C-D                         |
| 37        | Mut         | M      | 50  | Naïve     | Neg               | Pos            | Neg            | Neg           | Neg        | Normal     | Fig. 4B, Supp. Fig S7B                     |
| 38        | Unmut       | M      | 61  | Treated   | Neg               | Neg            | Neg            | Neg           | Pos        | Normal     | Fig. 4D, Fig. 5C-D                         |
| 39        | NA          | F      | 82  | Treated   | Neg               | Pos            | Neg            | Neg           | Neg        | Normal     | Fig. 4B, Supp. Fig S7B                     |
| 40        | Unmut       | M      | 59  | Naïve     | Neg               | Pos            | Pos            | Neg           | Neg        | NA         | Fig. 4B                                    |

IGHV: immunoglobulin heavy-chain variable region gene, Unmut: unmutated *IGHV*, Mut: mutated *IGHV*; M: male, F: female; Neg: negative, Pos: positive; NA: not available, Fig: Figure. \*Complex karyotype is defined as >3 cytogenetic abnormalities.
