# Supplementary material for: Novel Spirocyclic Dimer, SpiD3, Targets Chronic Lymphocytic Leukemia Survival Pathways with Potent Preclinical Effects
Source: PubMed Central journal article supplement (PMC11110724; doi:10.1158/2767-9764.crc-24-0071), 2024-05-22
Supplement: crc-24-0071-s11.pdf [file crc-24-0071-s11.pdf]

**Table S2: List of primary antibodies used for immunoblotting assays in the study**

| Primary Antibodies               | Catalog   | RRID             |
|----------------------------------|-----------|------------------|
| <b>Cell Signaling Technology</b> |           |                  |
| p4E-BP1 (Ser65)                  | 9456      | RRID:AB_823413   |
| 4E-BP1                           | 9644      | RRID:AB_2097841  |
| p-BTK (Tyr223)                   | 87457     | RRID:AB_2800102  |
| BTK                              | 8547      | RRID:AB_10950506 |
| CHOP                             | 2895      | RRID:AB_2089254  |
| p-eIF2 $\alpha$ (Ser51)          | 3398      | RRID:AB_2096481  |
| eIF2 $\alpha$                    | 5324      | RRID:AB_10692650 |
| eIF4A                            | 2490      | RRID:AB_823487   |
| eIF4E                            | 2067      | RRID:AB_2097675  |
| eIF4G                            | 2469      | RRID:AB_2096028  |
| p-ERK1/2 (Thr202/Tyr204)         | 4377      | RRID:AB_331775   |
| ERK1/2                           | 4695      | RRID:AB_390779   |
| GAPDH                            | 5174      | RRID:AB_10622025 |
| $\gamma$ H2A.X (Ser139)          | 9718      | RRID:AB_2118009  |
| HO-1/HMOX1                       | 43966     | RRID:AB_2799254  |
| IKK $\beta$                      | 8943      | RRID:AB_11024092 |
| IRE1 $\alpha$                    | 3294      | RRID:AB_823545   |
| MCL1                             | 5453      | RRID:AB_10694494 |
| MYC                              | 5605      | RRID:AB_1903938  |
| p21                              | 2947      | RRID:AB_823586   |
| p52                              | 4882      | RRID:AB_10695537 |
| PARP                             | 9542      | RRID:AB_2160739  |
| PDCD4                            | 9535      | RRID:AB_2162318  |
| PERK                             | 5683      | RRID:AB_10841299 |
| p-PRAS (Thr246)                  | 13175     | RRID:AB_2798140  |
| PRAS                             | 2691      | RRID:AB_2225033  |
| RELB                             | 10544     | RRID:AB_2797727  |
| <b>Invitrogen</b>                |           |                  |
| LAMIN B1                         | 702972    | RRID:AB_2784553  |
| XBP1 (spliced/unspliced)         | PA5-27650 | RRID:AB_2545126  |
| <b>Santa Cruz Biotechnology</b>  |           |                  |
| $\beta$ -ACTIN                   | sc-47778  | RRID:AB_626632   |
| IKK $\alpha$                     | sc-52932  | RRID:AB_783991   |
| p65                              | sc-8008   | RRID:AB_628017   |
| <b>Sigma</b>                     |           |                  |
| $\alpha$ -TUBULIN                | T5201     | RRID:AB_609915   |
| <b>Proteintech</b>               |           |                  |
| ATF4                             | 10835     | RRID:AB_2058600  |
